# Supplementary material
Source: ML conference proceedings conference paper supplement (https://openreview.net/forum?id=hZucDPawRu)

Comparison of Different Methods

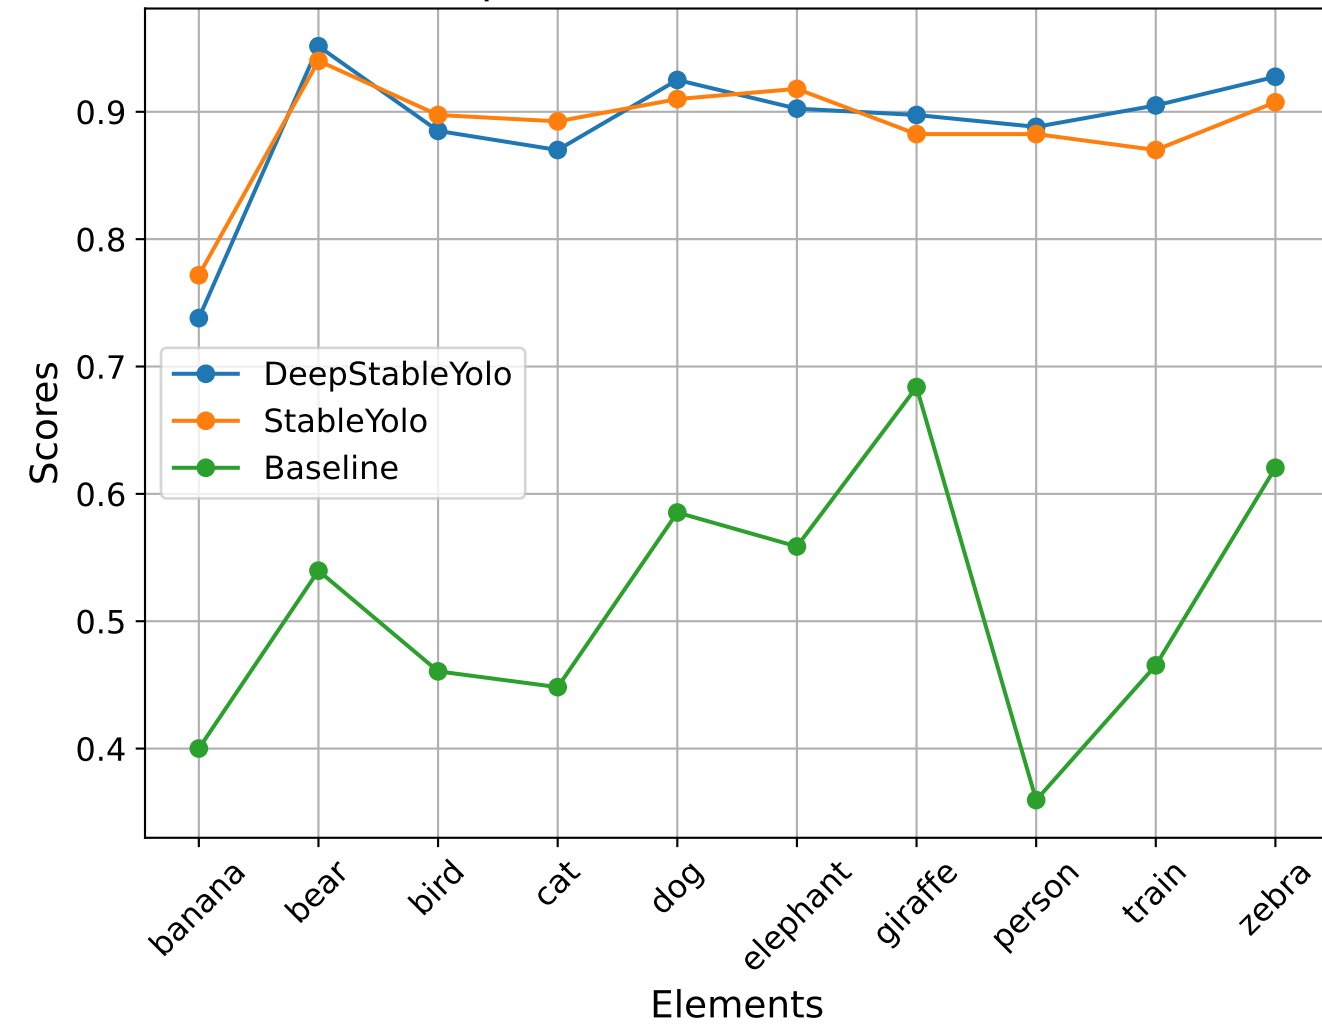

Score Distributions

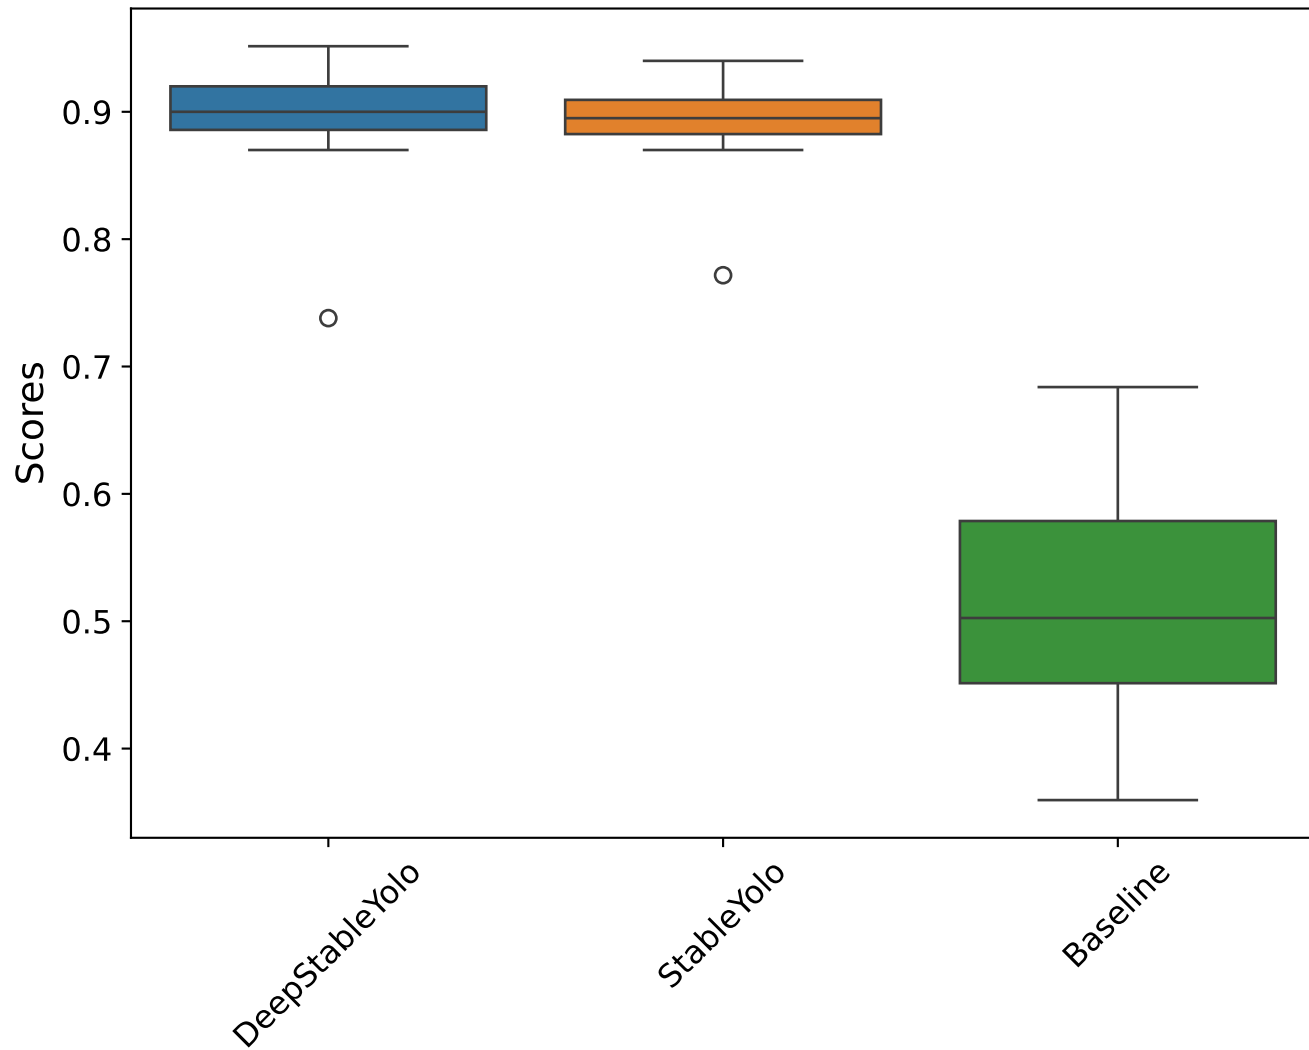

Supplement: supplementary_material [file attachment]

## Top Words for DeepStableYolo

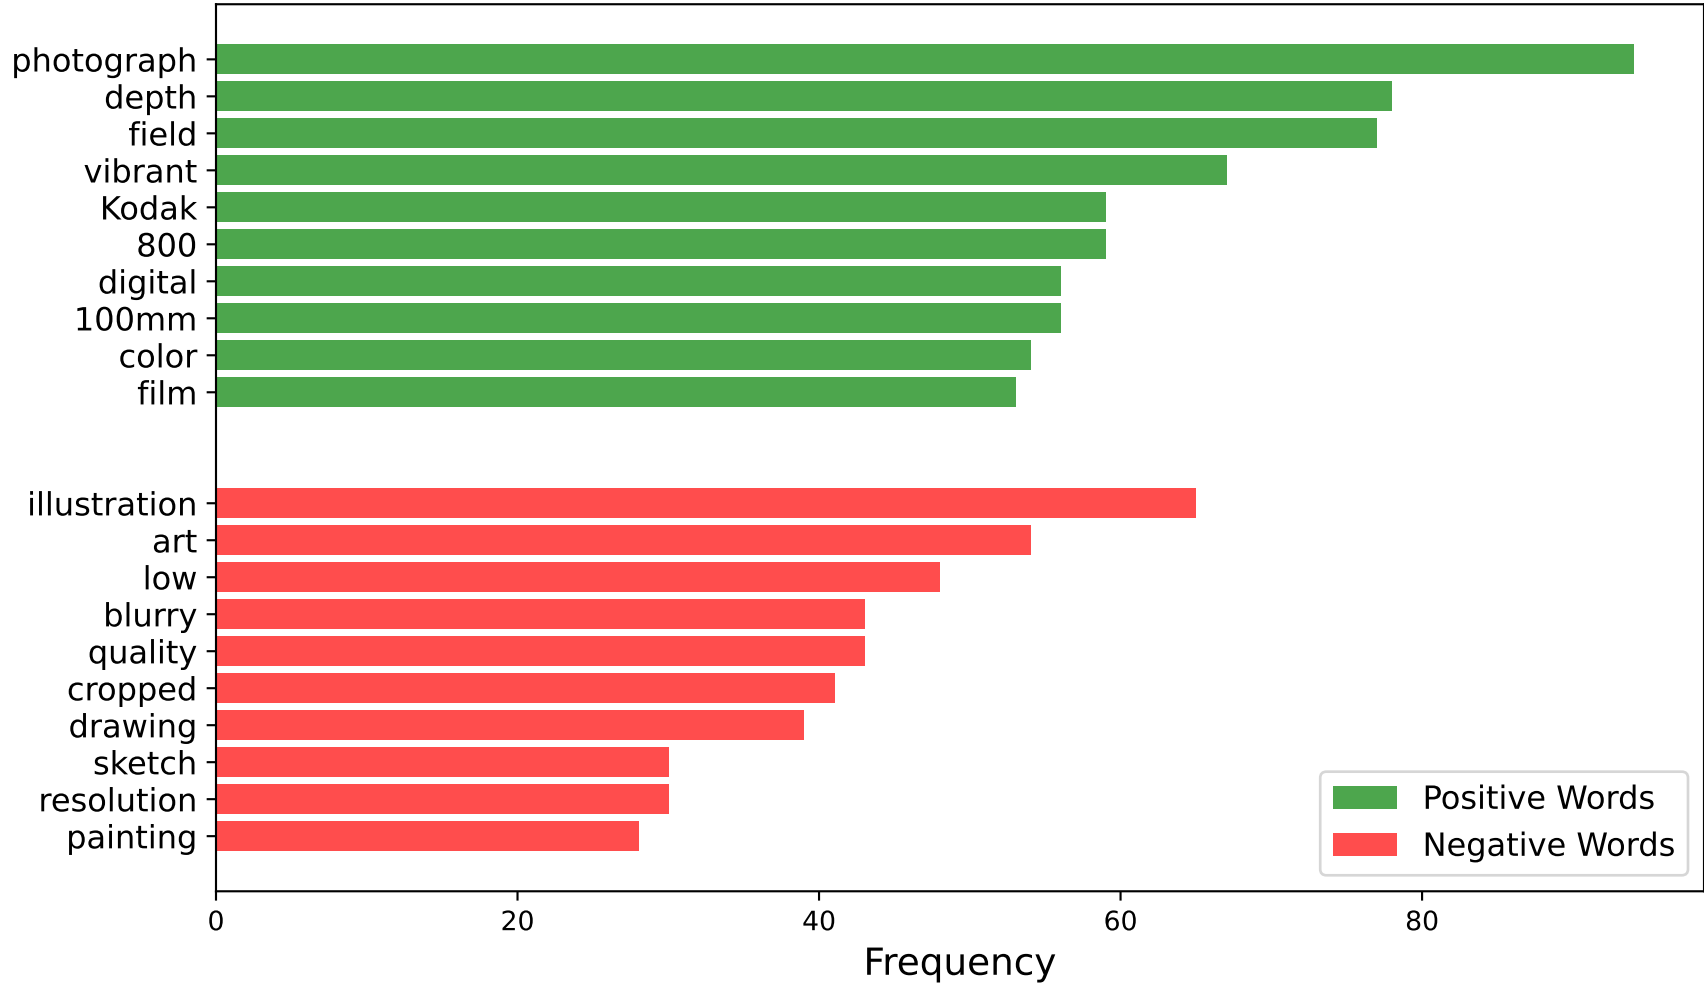

Supplement: supplementary_material [file attachment]

## Top Words for StableYolo

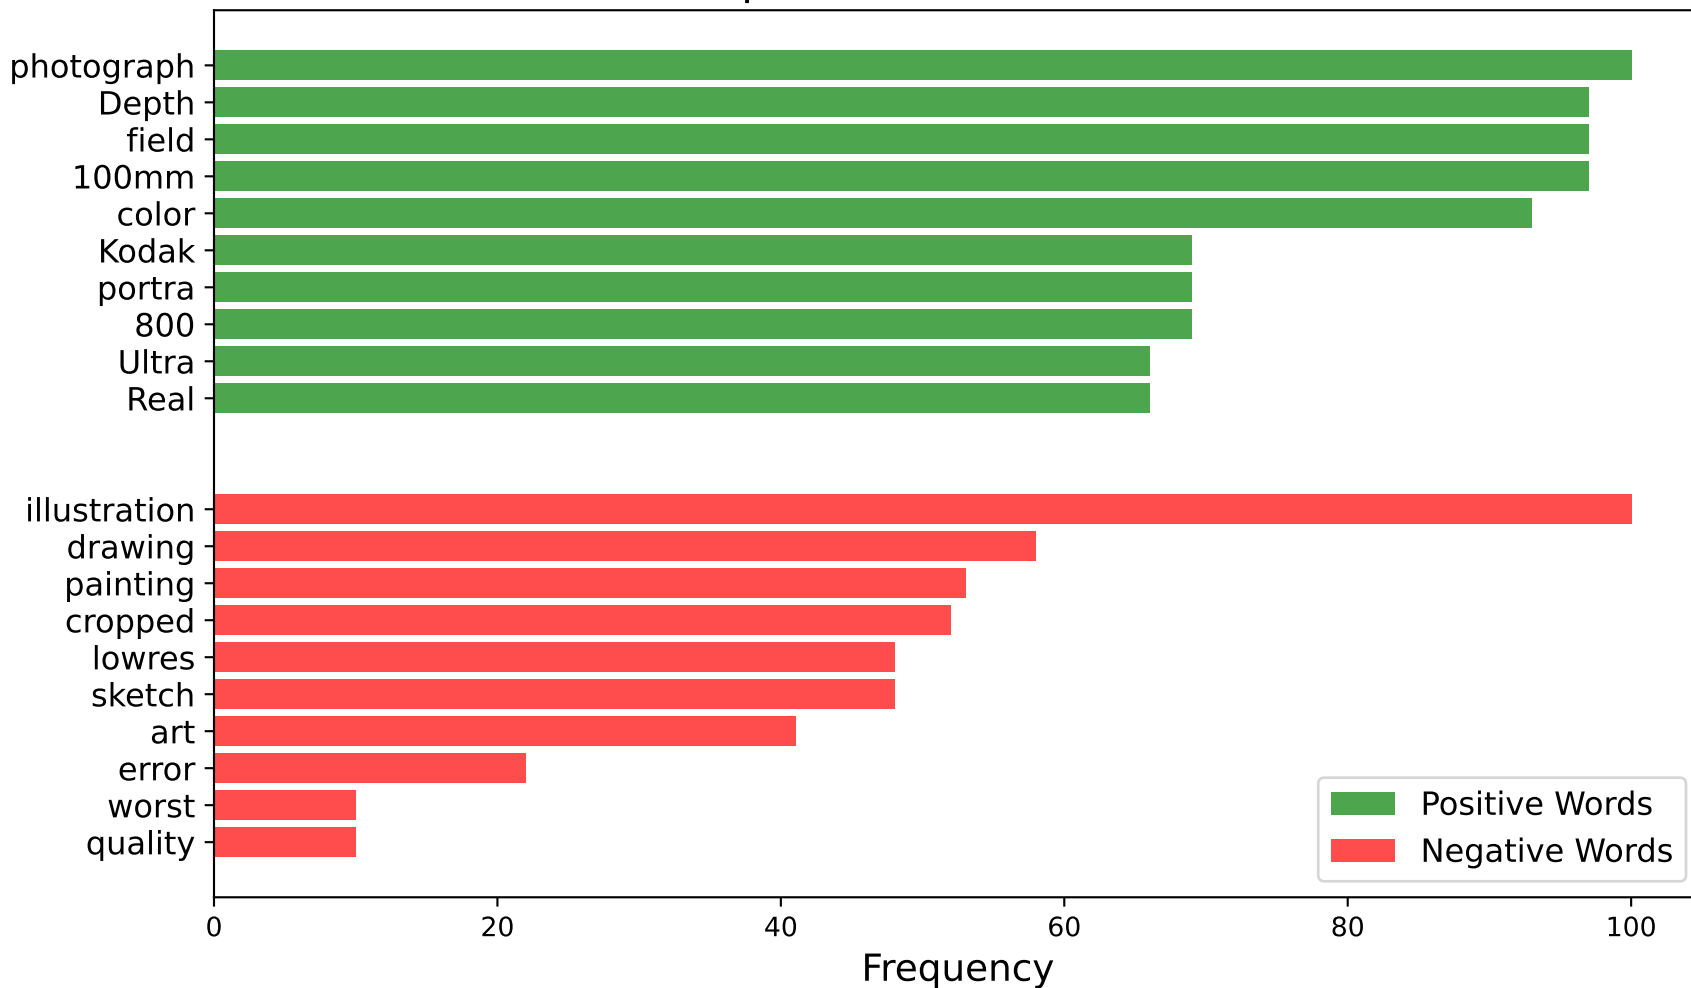

Supplement: supplementary_material [file attachment]
